# Supplementary material for: Subcritical Water Extraction of Valuable Metals from Spent Lithium-Ion Batteries
Source: PubMed Central journal article supplement (PMC7248760; doi:10.3390/molecules25092166), 2020-05-06
Supplement: molecules-25-02166-s001.pdf [file molecules-25-02166-s001.pdf]

Supplementary Materials

# Subcritical Water Extraction of Valuable Metals from Spent Lithium-ion Batteries

Jenni Lie, Stefani Tanda and Jhy-Chern Liu \*

Department of Chemical Engineering, National Taiwan University of Science and Technology, 43 Keelung Road, Section 4, Taipei 106, Taiwan

\* Correspondence: liu1958@mail.ntust.edu.tw

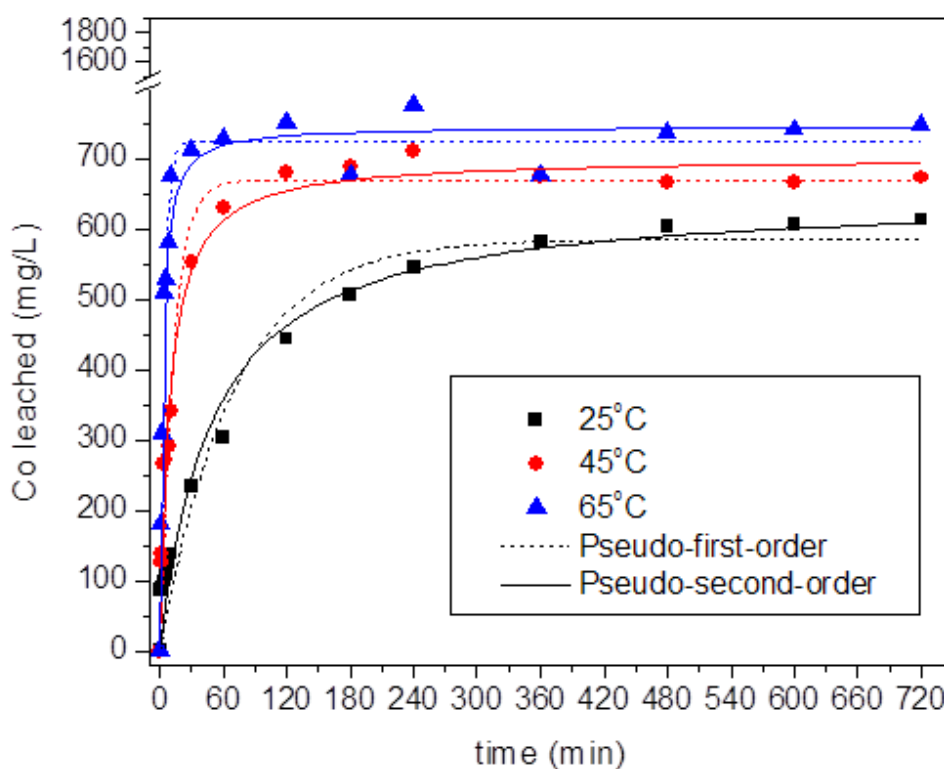

**Figure S1.** Kinetic plot of Co extraction at different temperature using 0.5 M HCl with 10 g/L of solid to liquid ratio.

**Table S1.** Kinetic parameters of Co extraction with 0.5 M HCl.

| Co Temperature | Pseudo-First-Order |                |                | Pseudo-Second-Order |                |                |
|----------------|--------------------|----------------|----------------|---------------------|----------------|----------------|
|                | Ce                 | k <sub>1</sub> | R <sup>2</sup> | Ce                  | k <sub>2</sub> | R <sup>2</sup> |
| 25°C           | 584.59             | 0.01           | 0.955          | 648.68              | 3.19E-05       | 0.974          |
| 45°C           | 668.74             | 0.08           | 0.974          | 701.36              | 1.62E-04       | 0.985          |
| 65°C           | 723.83             | 0.26           | 0.978          | 745.71              | 5.80E-04       | 0.973          |

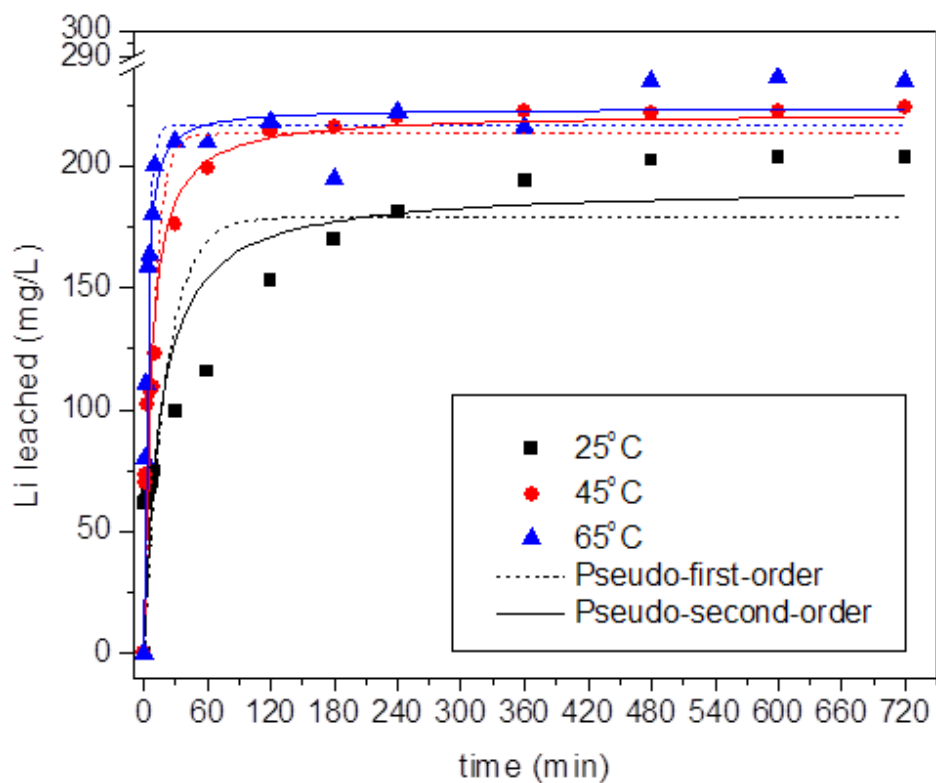

**Figure S2.** Kinetic plot of Li extraction at different temperatures using 0.5 M HCl with 10 g/L of solid to liquid ratio.

**Table S2.** Kinetic parameters of Li extraction with 0.5 M HCl.

| Li<br>Temperature | Pseudo-First-Order |                |                | Pseudo-Second-Order |                |                |
|-------------------|--------------------|----------------|----------------|---------------------|----------------|----------------|
|                   | Ce                 | k <sub>1</sub> | R <sup>2</sup> | Ce                  | k <sub>2</sub> | R <sup>2</sup> |
| 25°C              | 178.98             | 0.04           | 0.774          | 191.45              | 3.60E-04       | 0.864          |
| 45°C              | 213.29             | 0.11           | 0.916          | 221.86              | 7.67E-04       | 0.962          |
| 65°C              | 216.83             | 0.31           | 0.949          | 223.68              | 2.41E-03       | 0.974          |

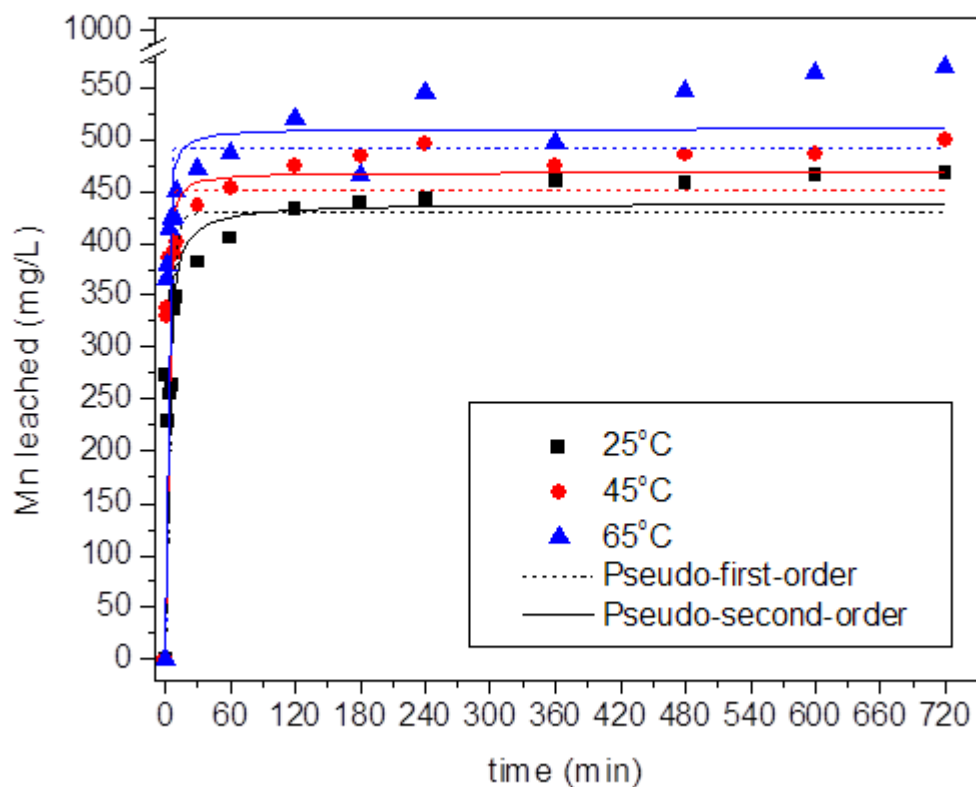

**Figure S3.** Kinetic plot of Mn extraction at different temperature using 0.5 M HCl with 10 g/L of solid to liquid ratio.

**Table S3.** Kinetic parameters of Mn extraction with 0.5 M HCl.

| Mn Temperature | Pseudo-First-Order |                |                | Pseudo-Second-Order |                |                |
|----------------|--------------------|----------------|----------------|---------------------|----------------|----------------|
|                | Ce                 | k <sub>1</sub> | R <sup>2</sup> | Ce                  | k <sub>2</sub> | R <sup>2</sup> |
| 25°C           | 429.08             | 0.26           | 0.770          | 438.72              | 1.18E-03       | 0.882          |
| 45°C           | 450.44             | 0.97           | 0.872          | 468.60              | 3.13E-03       | 0.950          |
| 65°C           | 490.93             | 1.03           | 0.844          | 510.60              | 3.04E-03       | 0.919          |

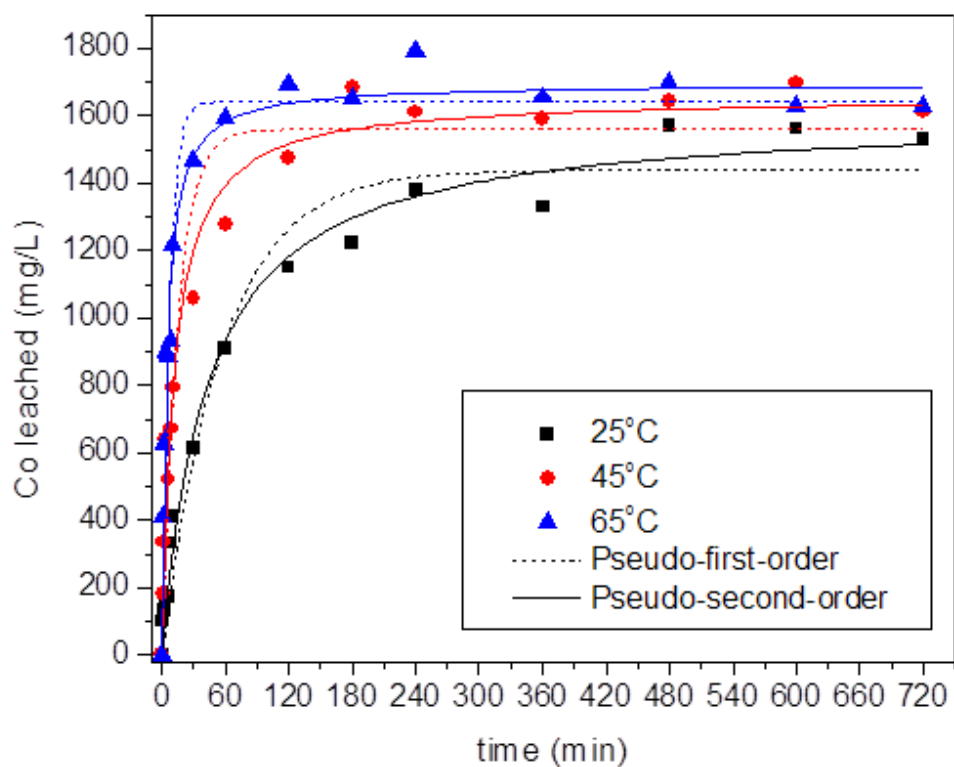

**Figure S4.** Kinetic plot of Co extraction at different temperatures using 0.5 M ascorbic acid with 10 g/L of solid to liquid ratio.

**Table S4.** Kinetic parameters of Co extraction with 0.5 M ascorbic acid.

| Co<br>Temperature | Pseudo-First-Order |                |                | Pseudo-Second-Order |                |                |
|-------------------|--------------------|----------------|----------------|---------------------|----------------|----------------|
|                   | Ce                 | k <sub>1</sub> | R <sup>2</sup> | Ce                  | k <sub>2</sub> | R <sup>2</sup> |
| 25°C              | 1438.95            | 0.02           | 0.967          | 1604.72             | 1.45E-05       | 0.988          |
| 45°C              | 1559.83            | 0.07           | 0.938          | 1656.69             | 5.39E-05       | 0.977          |
| 65°C              | 1640.94            | 0.15           | 0.949          | 1695.69             | 1.38E-04       | 0.979          |

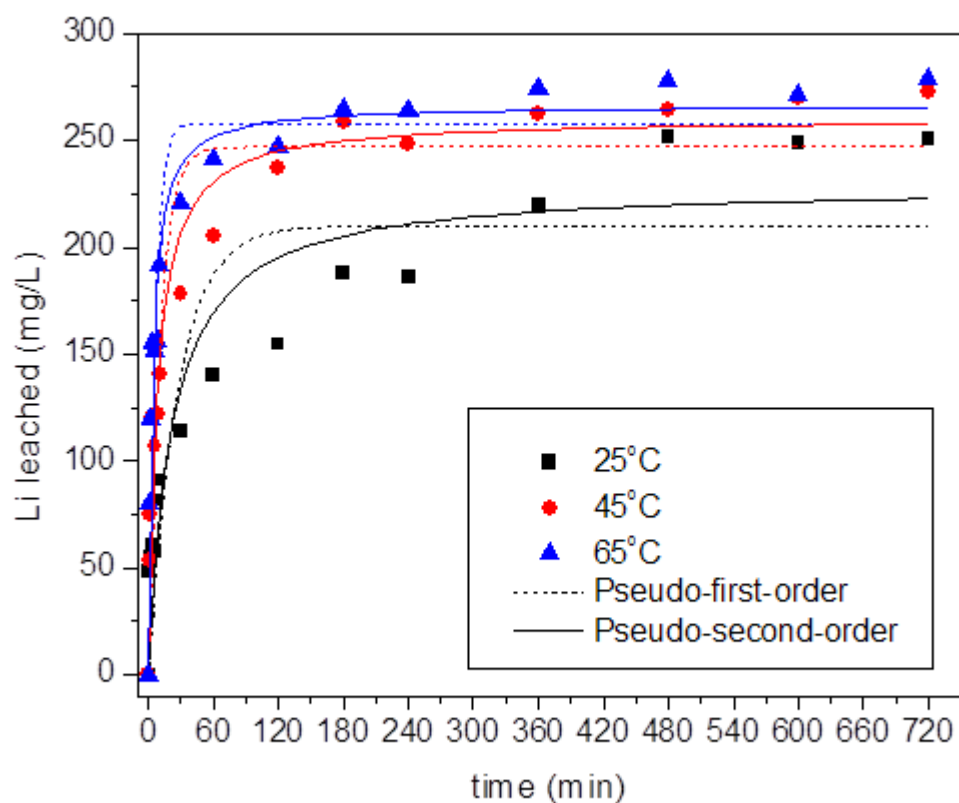

**Figure S5.** Kinetic plot of Li extraction at different temperatures using 0.5 M ascorbic acid with 10 g/L of solid to liquid ratio.

**Table S5.** Kinetic parameters of Li extraction with 0.5 M ascorbic acid.

| Li Temperature | Pseudo-First-Order |                |                | Pseudo-Second-Order |                |                |
|----------------|--------------------|----------------|----------------|---------------------|----------------|----------------|
|                | Ce                 | k <sub>1</sub> | R <sup>2</sup> | Ce                  | k <sub>2</sub> | R <sup>2</sup> |
| 25°C           | 209.81             | 0.04           | 0.814          | 229.06              | 2.09E-04       | 0.892          |
| 45°C           | 246.77             | 0.10           | 0.904          | 260.32              | 4.99E-04       | 0.961          |
| 65°C           | 257.78             | 0.17           | 0.904          | 266.45              | 1.05E-03       | 0.965          |

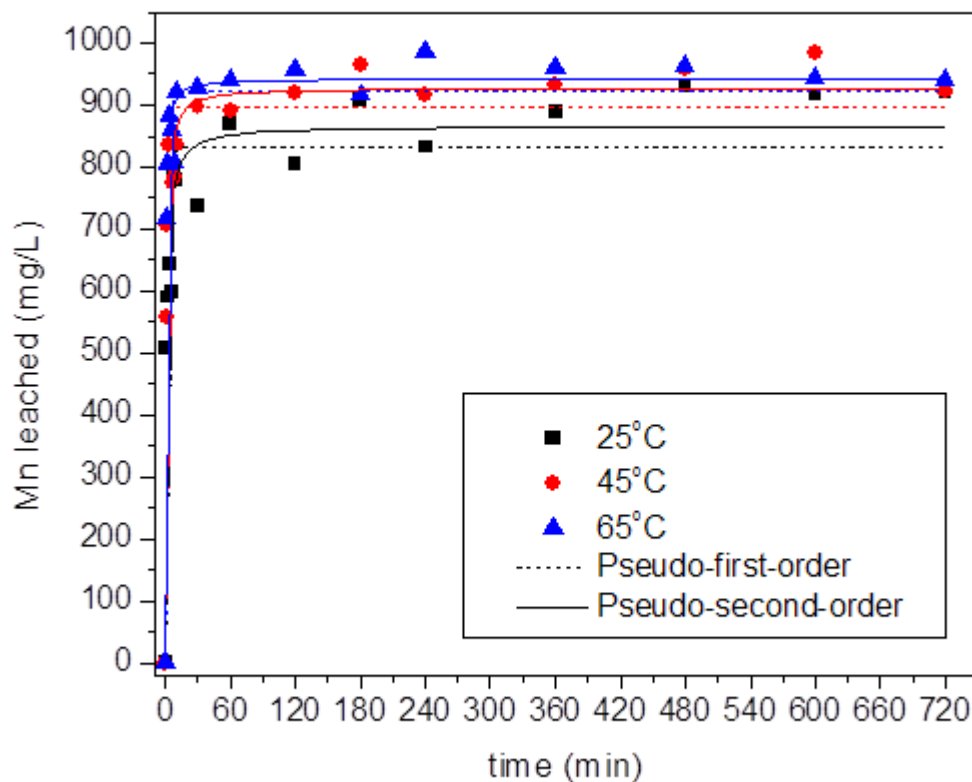

**Figure S6.** Kinetic plot of Mn extraction at different temperatures using 0.5 M ascorbic acid with 10 g/L of solid to liquid ratio.

**Table S6.** Kinetic parameters of Mn extraction with 0.5 M ascorbic acid.

| Mn Temperature | Pseudo-First-Order |                |                | Pseudo-Second-Order |                |                |
|----------------|--------------------|----------------|----------------|---------------------|----------------|----------------|
|                | Ce                 | k <sub>1</sub> | R <sup>2</sup> | Ce                  | k <sub>2</sub> | R <sup>2</sup> |
| 25°C           | 832.06             | 0.60           | 0.842          | 866.67              | 1.10E-03       | 0.928          |
| 45°C           | 896.81             | 0.85           | 0.935          | 928.05              | 1.54E-03       | 0.977          |
| 65°C           | 922.00             | 1.37           | 0.959          | 942.51              | 3.07E-03       | 0.981          |

**Table S7.** Activation energy using Arrhenius equation for leaching Co, Li, and Mn from spent lithium ion batteries in 0.5 M of HCl and ascorbic acid.

| Element | Ea (kJ/mol) |               |
|---------|-------------|---------------|
|         | HCl         | Ascorbic Acid |
| Co      | 60.823      | 47.191        |
| Li      | 39.590      | 33.928        |
| Mn      | 20.178      | 21.229        |

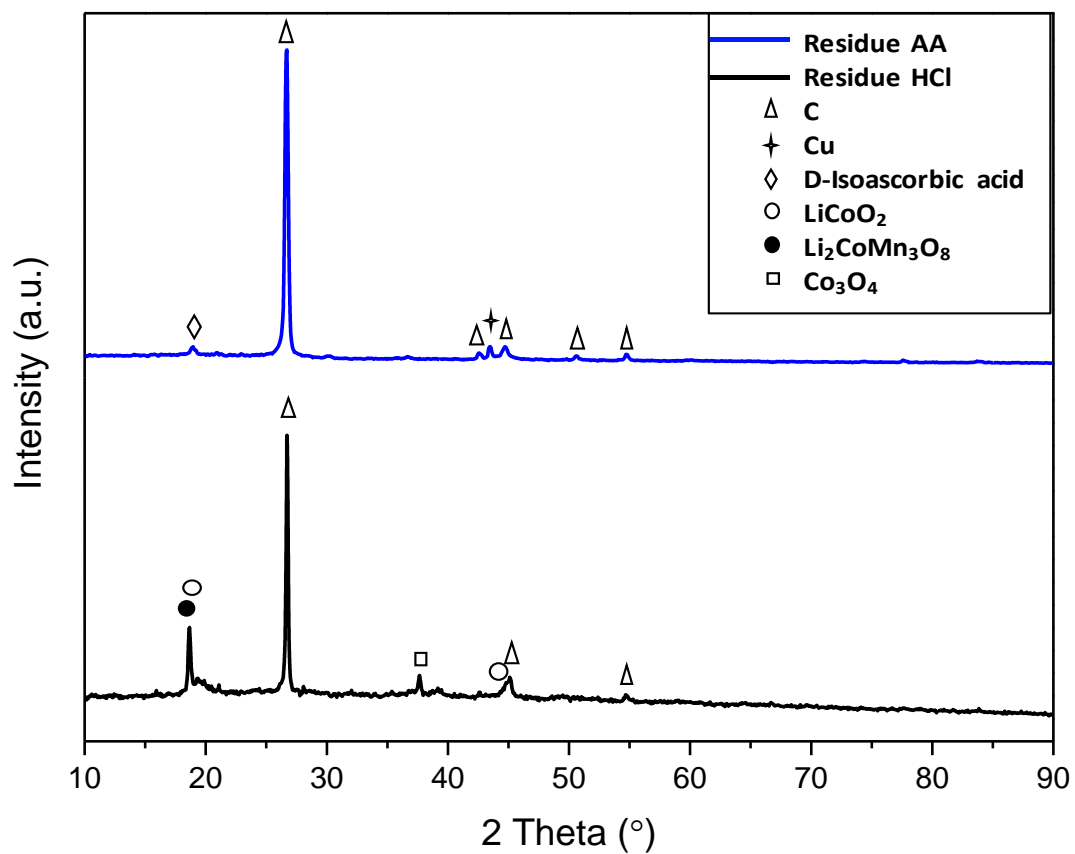

Figure S7. XRD spectra of leaching residues of ascorbic acid and HCl after subject to SWE.
